# Supplementary material for: Machine Learning Approaches Identify Genes Containing Spatial Information From Single-Cell Transcriptomics Data
Source: PubMed Central journal article supplement (PMC7902049; doi:10.3389/fgene.2020.612840), 2021-02-01
Supplement: Data_Sheet_1.pdf [file Data_Sheet_1.pdf]

Supplementary Material of  
Machine Learning Approaches Identify  
Genes Containing Spatial Information From  
Single-Cell Transcriptomics Data

### 287 Cells are NOT uniquely mapped

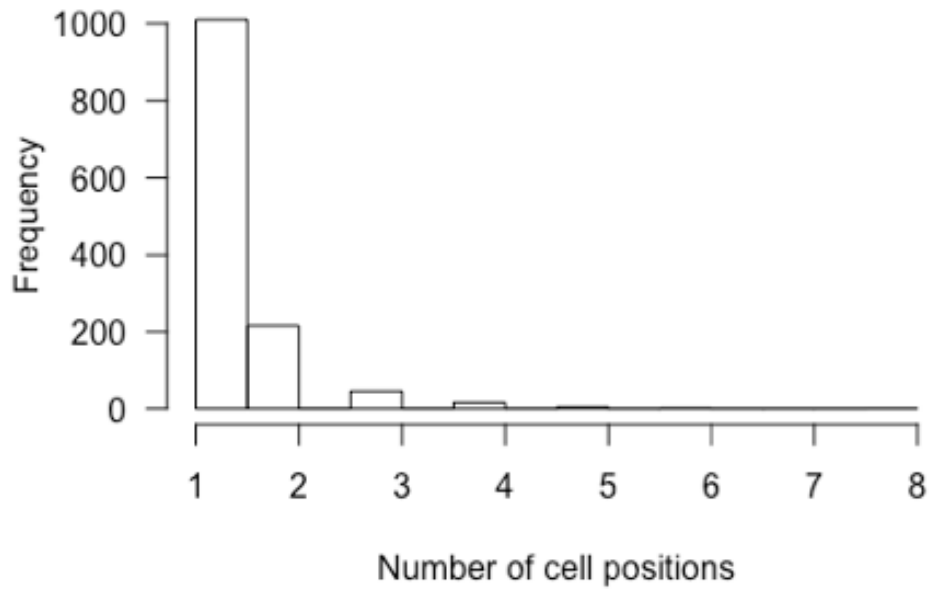

**Supplementary Figure S1.** DistMap (using all 84 inSitu genes) reports 287 cells that share their max-MCC position with another cell

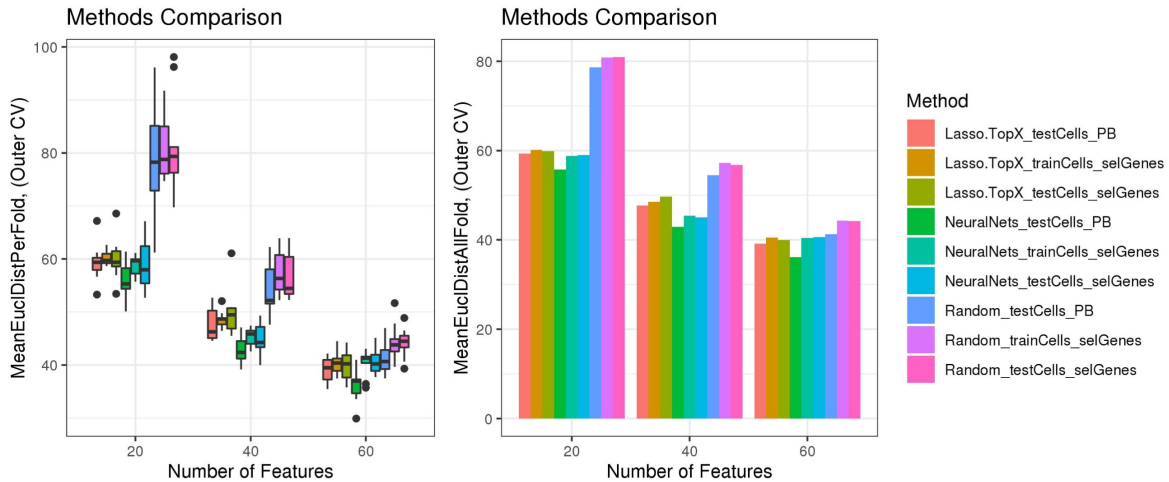

**Supplementary Figure S2. Comparison of different methods using Blind metric.**

Lasso.TopX (Lasso.TopX\_testCells\_selGenes) performed better on selecting 60 features, sub-challenge 1, whereas NeuralNets (Light Blue - NeuralNets\_testCells\_selGenes) performed better in selecting 40 and 20 genes, sub-challenges 2 and 3. Training and testing errors present small differences which point to there is no overfitting taking place in either Lasso.TopX (Lasso.TopX\_trainCells\_selGenes and Lasso.TopX\_testCells\_selGenes) or NeuralNets (NeuralNets\_trainCells\_selGenes and NeuralNets\_testCells\_selGenes). Both methods performed better than Random (Random\_trainCells\_selGenes and Random\_testCells\_selGenes). Using the provided binarized expression data, \_PB extension, led to overestimation of performance accuracy, Lasso.TopX\_testCells\_PB, NeuralNets\_testCells\_PB, Random\_testCells\_PB. Xaxis, different number of features (e.g. 60/40/20 for subchallenge #1/#2/#3 respectively). Yaxis, left figure, MeanEuclDistPerFold, Mean Euclidean Distance Per outer cross validation fold. Yaxis, right figure, MeanEuclDistAllFold, Mean Euclidean distance across all outer cross validation folds.

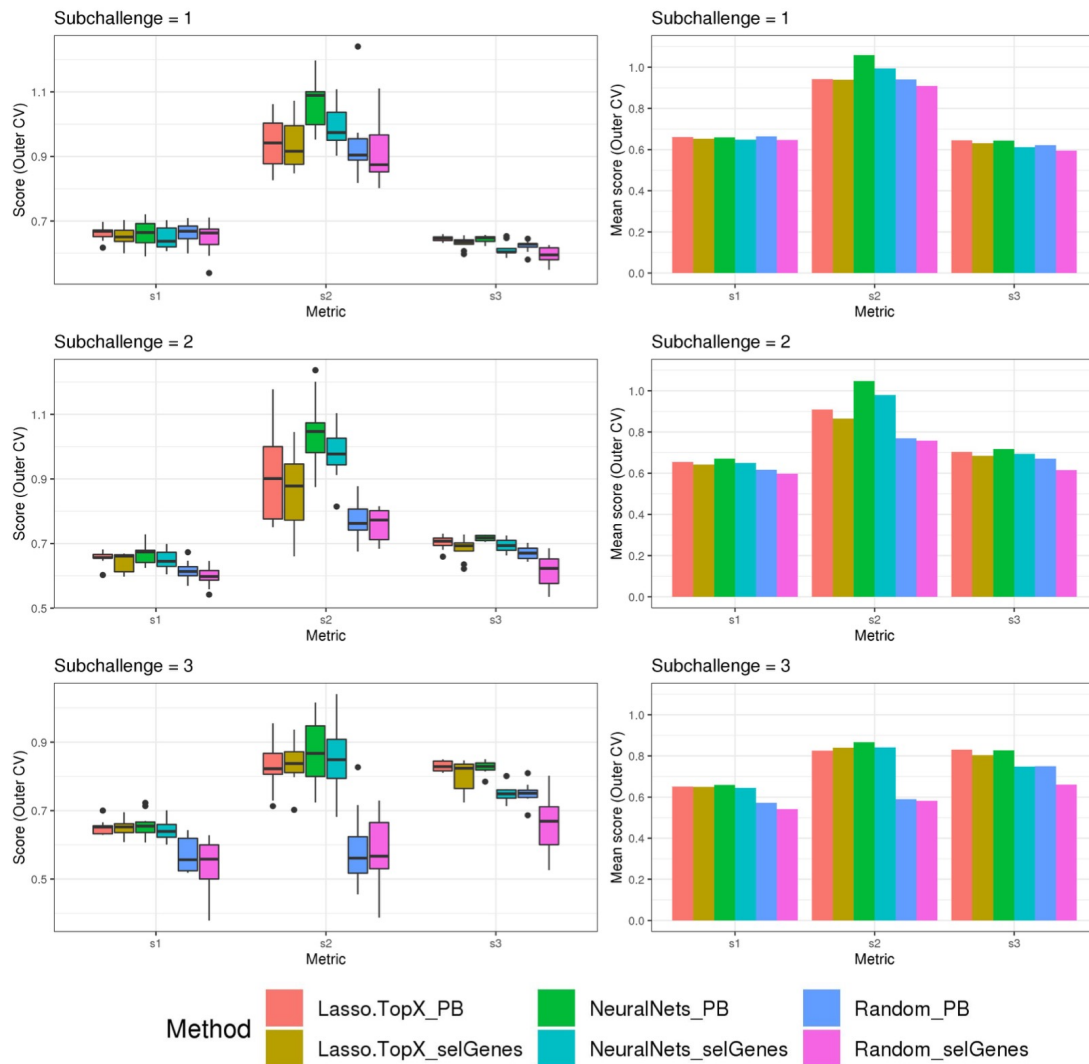

**Supplementary Figure S3. Comparison of different methods using organizers scoring functions.** For sub-challenge 1, Lasso.TopX performed better than NeuralNets for s1 and s3. For sub-challenge 2, NeuralNets performed better for all scores and for sub-challenge 3 Lasso.TopX performed better for s1 and s3 scores. In all sub-challenges, both methods performed better than Random (Random\_selGenes). The binarized expression data that were produced using all expression data, \_PB extension, showed an extreme bias in overestimation of performance, across all metrics, methods and sub-challenges. Lasso.TopX\_PB performed always better than Lasso.TopX\_selGenes, NeuralNets\_PB performed always better than NeuralNets\_selGenes and Random\_PB performed always better than Random\_selGenes.

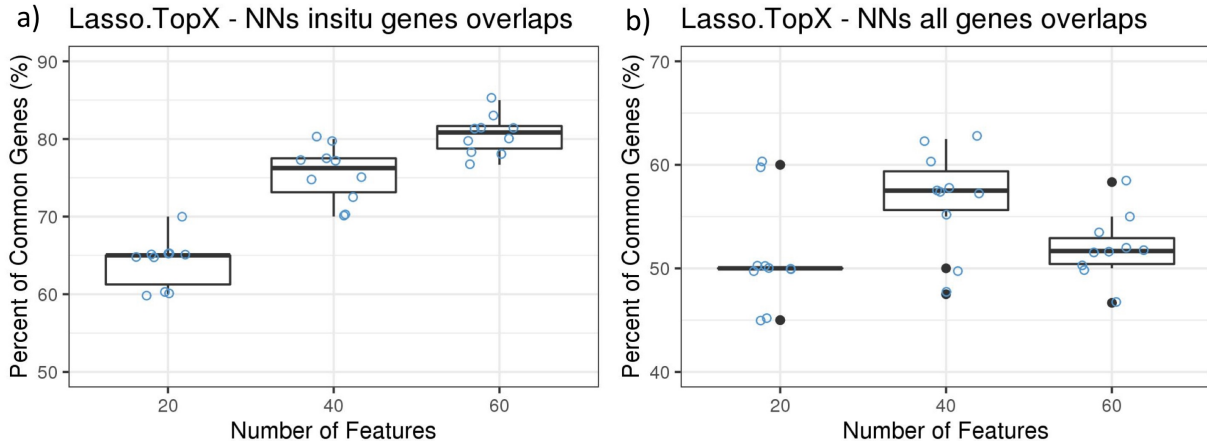

**Supplementary Figure S4.**

Percentage of gene overlaps between Lasso.TopX and NN across the 10 fold outer cross validation, using either only inSitu genes a), or all genes b). Yaxis: the percent of common genes between Neural Nets and Lasso.TopX, and Xaxis: the number of features selected. Boxplots and the corresponding data points in blue, are shown.

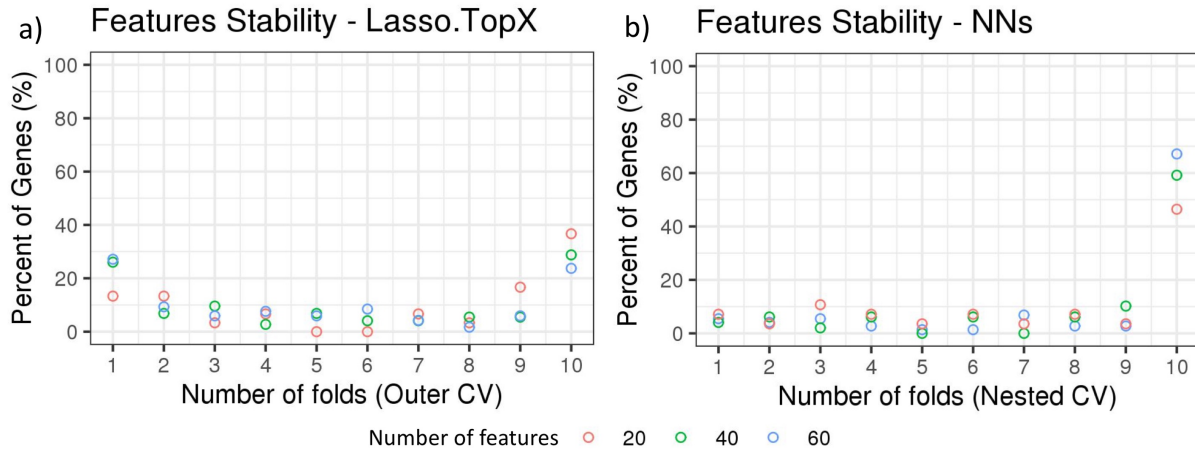

**Supplementary Figure S5. Features stability in Outer CV using all genes.**

The percentage of common selected genes across the 10 fold outer cross validation is shown. a) In the Lasso.TopX case, 30 genes were selected across all folds for subchallenge 3, red dots. 4 genes or 13.3% percent were selected only in 1 fold, 4 or 13.3% percent were selected by 3 folds, etc. 11 or 36.6% percent were selected in all 10 folds. b) In the NNs case, out of a total of 28 genes selected across all folds for subchallenge 3, red dots, 13 genes or 46.4% were selected across all 10 folds of the outer cross validation. Similar results are shown for subchallenge 1, and subchallenge 2, blue and green dots, respectively.
